# Supplementary material
Source: PubMed Central journal article supplement (PMC5961944)
Supplement: NIHMS966554-supplement-SuppMatl.pdf [file NIHMS966554-supplement-SuppMatl.pdf]

**Supporting Information**

**Quercetin Remodels the Tumor  
Microenvironment to Improve the Permeation,  
Retention and Antitumor Effects of  
Nanoparticles**

*Kaili Hu,<sup>†,‡</sup> Lei Miao,<sup>†</sup> Tyler J. Goodwin,<sup>†</sup> Jun Li,<sup>†</sup> Qi Liu,<sup>†</sup> Leaf Huang<sup>†,\*</sup>*

<sup>†</sup>Division of Pharmacoengineering and Molecular Pharmaceutics and Center for Nanotechnology in Drug Delivery, Eshelman School of Pharmacy, University of North Carolina at Chapel Hill, Chapel Hill, NC 27599, United States. <sup>‡</sup>Murad Research Center for Modernized Chinese Medicine, Institute of Interdisciplinary Integrative Medicine Research, Shanghai University of Traditional Chinese Medicine, Shanghai, 201203, People's Republic of China

\*Corresponding author. Tel.:+1 919 843 0736; Fax:+1 919 966 0197. E-mail address:  
leafh@email.unc.edu (L. Huang).

**Synthesis and characterization of quercetin phosphate (QP).** The synthetic scheme illustrated in Figure S1 was followed. The molecular weight of the ethyl protected QP intermediate was confirmed by MS spectrum ( $m/z=982.99$ ). The presence of five phosphate groups of the final QP was confirmed by the appearance of fivesinglets in the

$^{31}\text{P}$ -NMR spectrum (See Figure S2). The five phosphate groups on QP were further confirmed by  $^1\text{H}$ -NMR,  $^{13}\text{C}$ -NMR (Figure S2) and LC-MS ( $m/z=702.88$ ). The QP has improved hydrophilicity compared to parent quercetin.

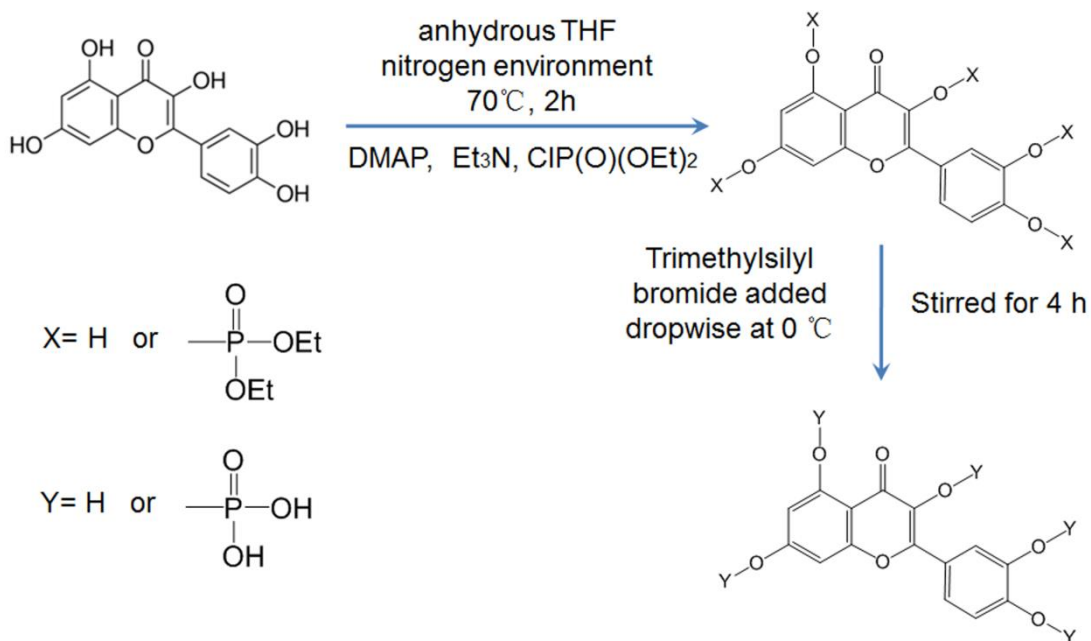

**Figure S1.** Scheme for synthesis of phosphorylated quercetin

### NMR-<sup>31</sup>P

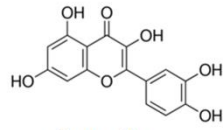

Quercetin

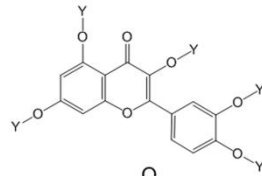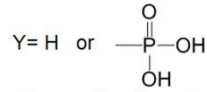

Quercetin phosphate

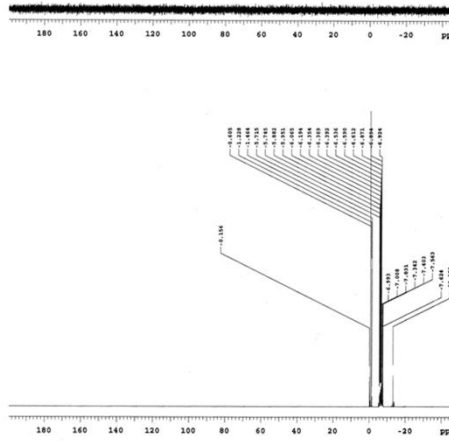

### NMR-<sup>1</sup>H

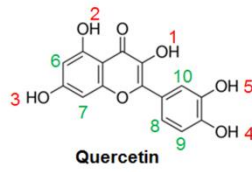

Quercetin

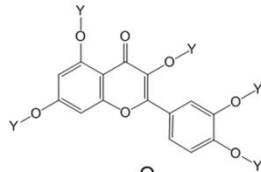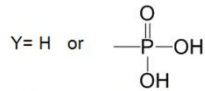

Quercetin phosphate

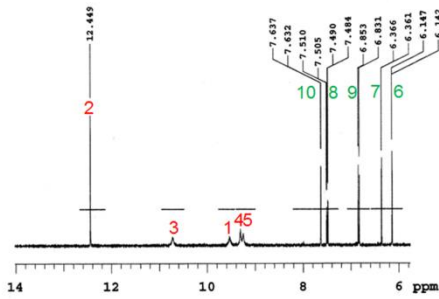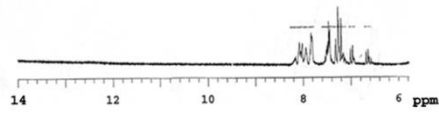

### NMR-<sup>13</sup>C

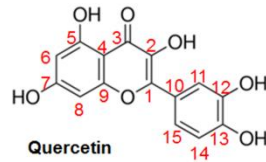

Quercetin

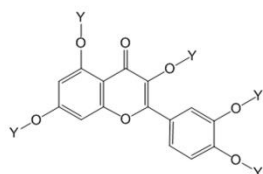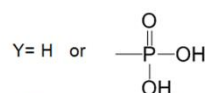

Quercetin phosphate

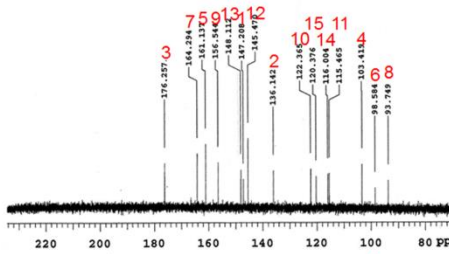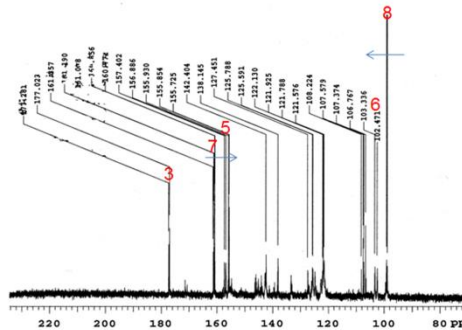

**Figure S2.** Structure and  $^{31}\text{P}$ -NMR,  $^1\text{H}$ -NMR,  $^{13}\text{C}$ -NMR spectrum of quercetin and phosphorylated quercetin.
